# Supplementary material
Source: PubMed Central journal article supplement (PMC3195595)
Supplement: supp_M111.280362_jbc.M111.280362-1.pdf [file supp_M111.280362_jbc.M111.280362-1.pdf]

## SUPPLEMENTAL DATA.

This data is intended for publication within the Supplemental information section

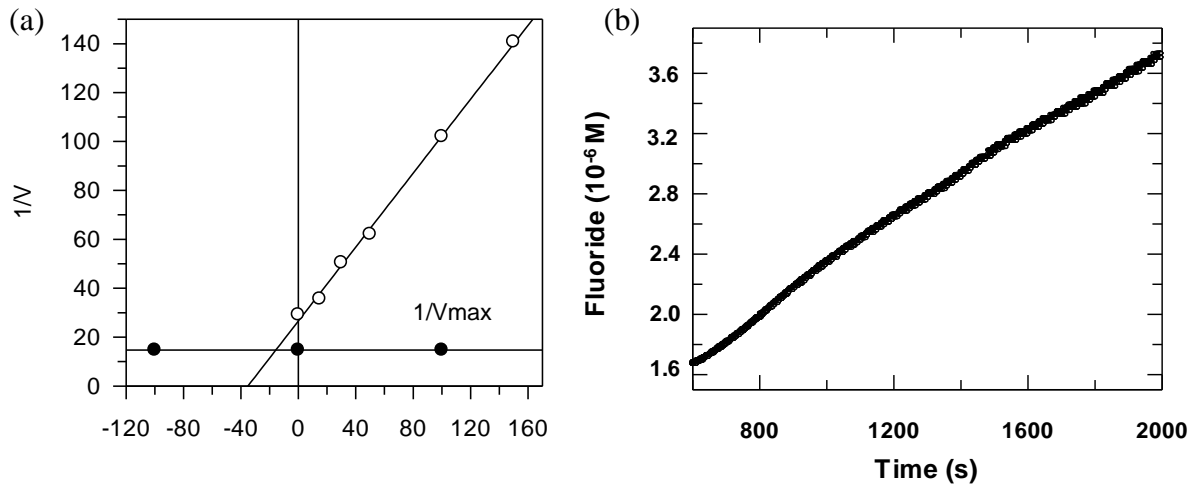

**Supplementary Figure 1:** (a) Dixon plot of 5FGlcF as an apparent reversible inhibitor of TreS (b) Reaction of 1 mM 5FGlcF and 0.5  $\mu$ M TreS enzyme at 37  $^{\circ}$ C, monitored by a fluoride ion electrode.

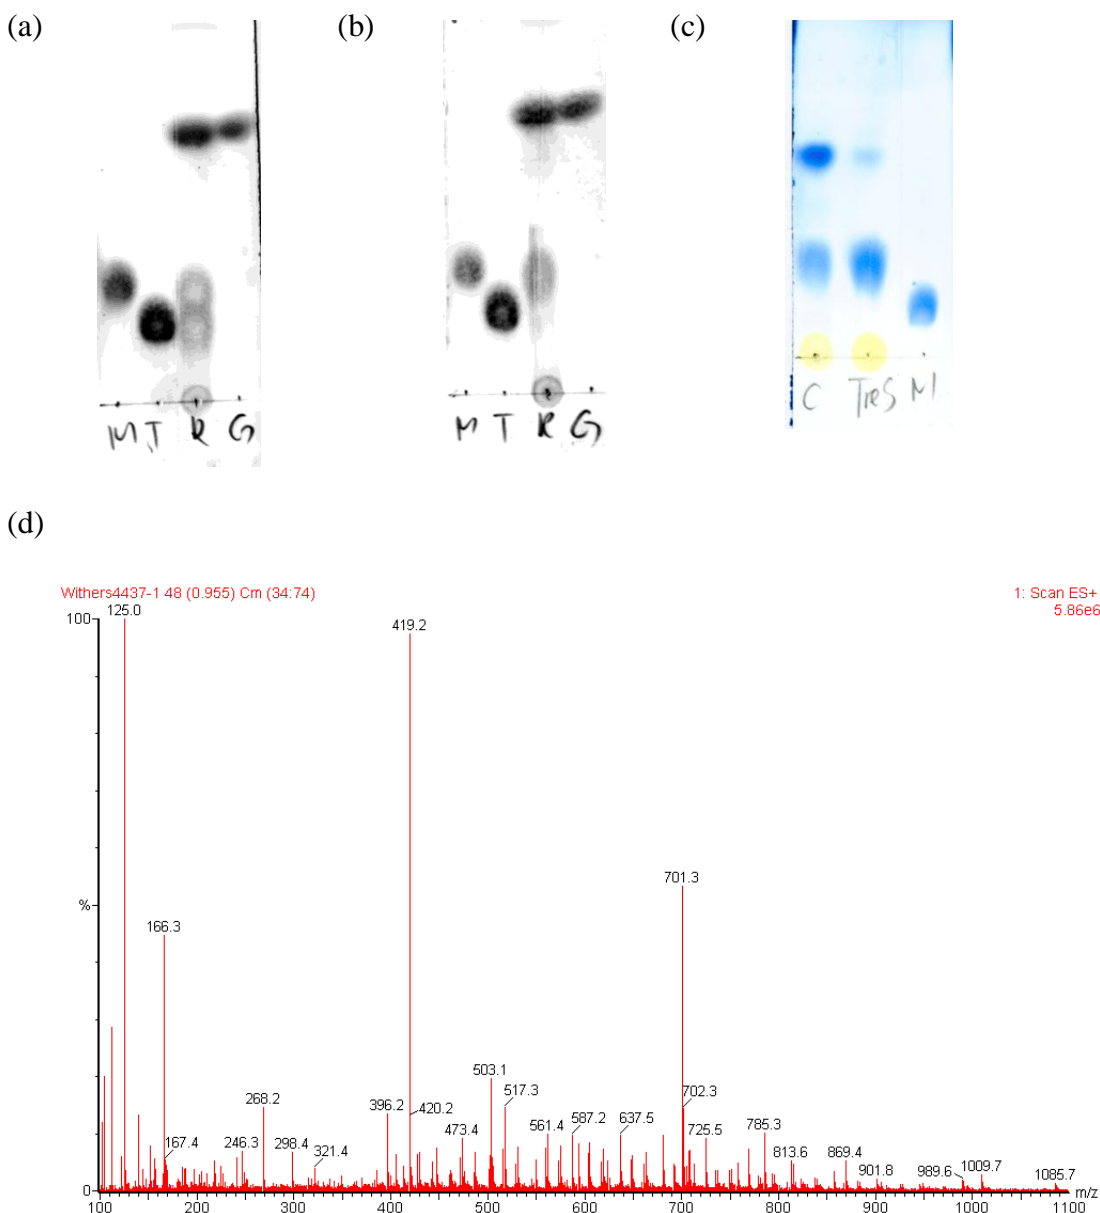

**Supplementary Figure 2:** TLC analysis of reactions (a) 10 mM U-<sup>13</sup>C-D-glucose, 2 mM maltose and 0.14 μM TreS (b) 10 mM U-<sup>13</sup>C-D-glucose, 2 mM maltose and no enzyme at 37 °C for 24 hours followed by lyophilization, acetylation and aqueous workup. There are four lanes in each of the TLC plates. From left to right: per-*O*-acetylated maltose; per-*O*-acetylated trehalose; reaction mixture; per-*O*-acetylated glucose. The TLC (aluminum-backed sheets of silica gel) was developed using the following mixed solvent system: diethyl ether/petroleum ether (v/v = 2:1). (c). TLC analysis of the reaction of 15 mM glucose, 5 mM αGlcF and 0.35 μM TreS enzyme at room temperature for 28 hours. The three lanes on the TLC are from left to right, control sample (no enzyme); TreS reaction

and maltose standard. The TLC was developed in EtOAc/MeOH/water (v/v/v = 7:2:1).  
(d) Mass spectrum of the reaction containing 10 mM U-<sup>13</sup>C-D-glucose, 2 mM maltose and 0.14 μM TreS at 37 °C for 24 hours followed by lyophilization, acetylation and aqueous workup.
